Differential regional decline in dopamine receptor availability across adulthood: Linear and nonlinear effects of age

Kendra L. Seaman

Center for the Study of Aging and Human Development, Duke University

Center for Cognitive Neuroscience, Duke University

Eric J. Juarez

Department of Psychology and Neuroscience, Duke University

Christopher T. Smith and Linh C. Dang

Department of Psychology, Vanderbilt University

Jaime C. Castellon

Department of Psychology and Neuroscience, Duke University

Leah L. Burgess, M. Danica San Juan, Paul M. Kundzicz, Ronald L. Cowan, David H. Zald

Department of Psychology, Vanderbilt University

Gregory R. Samanez-Larkin

Department of Psychology and Neuroscience, Duke University

Center for Cognitive Neuroscience, Duke University

**Author contributions:** G. R. Samanez-Larkin and D.H. Zald developed the study concept and design. J.C. Castellon, L. Burgess and M.D. San Juan collected the data. E.J. Juarez, P.M. Kundzicz and J.C. Castellon processed the PET and structural data under the supervision of C.T. Smith and L.C. Dang. K. L. Seaman performed the data analysis and interpretation under the supervision of G.R. Samanez-Larkin. K. L. Seaman drafted the

manuscript and C.T. Smith, G.R. Samanez-Larkin, and D.H. Zald provided critical revisions. All authors approved the final version of the manuscript for submission.

**Acknowledgements:** This study was supported by grants from the National Institute on Aging (R00-AG042596; T32-AG000029; R01-AG044838; R01-AG043458).

**Data:** Pictures, scatterplots, and statistics for each ROI are available in an interactive app online at <http://13.58.222.229:3838/agebp/>. Data and code used in the manuscript can be viewed and downloaded from [https://osf.io/h67k4/?view\\_only=7f99796797894a1085d42b69c4d621c5](https://osf.io/h67k4/?view_only=7f99796797894a1085d42b69c4d621c5) .

## Abstract

Theories of adult brain development, based on neuropsychological test results and structural neuroimaging, suggest differential rates of age-related change in function across cortical and subcortical sub-regions. However, it remains unclear if these trends also extend to the aging dopamine system. Here we examined cross-sectional adult age differences in estimates of D2-like receptor binding potential across several cortical and subcortical brain regions using PET imaging and the radiotracer [18F]fallypride in two samples of healthy human adults (combined  $N=132$ ). After accounting for regional differences in overall radioligand binding, estimated percent declines in receptor binding potential by decade (linear effects) were highest in most temporal and frontal cortical regions (~6–9% per decade), moderate in parahippocampal gyrus, pregenual frontal cortex, fusiform gyrus, caudate, putamen, thalamus, and amygdala (~3–5%), and weakest in subcallosal frontal cortex, ventral striatum, pallidum, and hippocampus (~0–2%). Some regions showed linear effects of age while many (e.g., temporal cortex, putamen) showed curvilinear effects such that binding potential declined from young adulthood to middle age and then was relatively stable until old age. Overall, these data indicate that the rate and pattern of decline in D2 receptor availability is regionally heterogeneous. However, the differences across regions were challenging to organize within existing theories of brain development and did not show the same pattern of regional change that has been observed in gray matter volume, white matter integrity, or cognitive performance. This variation suggests that existing theories of adult brain development may need to be modified to better account for the spatial dynamics of dopaminergic system aging.

## Introduction

One of the most prominent theories of adult brain development is the dopamine hypothesis of aging (Bäckman & Farde, 2001; Bäckman et al., 2000; Bäckman, Lindenberger, Li, & Nyberg, 2010; Bäckman, Nyberg, Lindenberger, Li, & Farde, 2006; Li, Lindenberger, Nyberg, Heekeren, & Bäckman, 2009). In its strongest form, this hypothesis posits that age-related changes in cognition are due primarily to well-documented losses of dopaminergic function with age. However, many cognitive functions that also are posited to rely on dopaminergic circuits, particularly motivational cognitive functions (Carstensen, 2006; Carstensen & Mikels, 2005; Charles, Mather, & Carstensen, 2003; Lang & Carstensen, 2002; Mather, 2006), appear to be preserved with age. To reconcile these disparate theories and results, either motivational functions do not depend on the dopamine system in older age or there may be regional differences in the decline of the dopaminergic system. An example of the latter account would be that regions supporting preserved cognitive function show relatively preserved dopaminergic function, while regions supporting cognitive functions showing declines would have steeper dopaminergic loss. Thus, clarifying the degree to which regions are, and are not, demonstrating dopaminergic signaling decline with age could help elucidate why various dopamine-dependent cognitive functions differentially change with age.

Studies of neurocognitive function, as well as gray matter and white matter structure, have identified differential decline in cognitive aging. Some theories of adult brain development suggest that compared to other brain regions, the frontal lobes show steeper age-related decline. These theories include the frontal lobe hypothesis of cognitive aging (West, 1996, 2000) and the anterior-posterior gradient described in studies of both gray matter volume (e.g. (Raz & Rodrigue, 2006)) and white matter integrity (e.g. (Sullivan & Pfefferbaum, 2006)). Recent work, however, has suggested a more nuanced view of adult development and aging. For instance, cognitive functions that are thought to be independent of the frontal lobes also display significant age-related decline (Greenwood, 2000; Rubin, 1999) while tasks that are assumed to be frontal-dependent can be impaired with caudate or putamen lesions (Rubin, 1999). Further, several studies have showed that a monotonic decrease in white matter integrity extends well beyond the frontal lobes (Bennett, Madden, Vaidya, Howard, & Howard, 2010; Davis et al., 2009).

These qualifiers led to revised theories of adult brain development, which suggest that relative to medial brain regions, lateral regions undergo greater age-related decline. For example, the dorsolateral prefrontal theory of cognitive aging suggests that compared to ventromedial-dependent tasks, greater age-related differences are found in dorsolateral-dependent tasks (MacPherson, Phillips, & Della Sala, 2002). Similarly, the “last-in, first-out” or retrogenesis hypothesis of aging (Davis et al., 2009; Fjell et al., 2009; Raz, 2000) suggest regions which mature later in development and evolution are the first to display age-related vulnerability to decline, while phylogenetically older areas of the brain are preserved. This theory is supported by studies showing age-related gray matter decreases in the association cortices in middle age (McGinnis, Brickhouse, Pascual, & Dickerson, 2011), medial temporal lobes in early-old age (Fjell et al., 2013; Raz, Ghisletta, Rodrigue, Kennedy, & Lindenberger, 2010; Raz et al., 2005; Yang et al., 2016), and primary sensory cortices later in late-old age (Yang et al., 2016). Additionally, some studies have shown that in healthy aging, the hippocampus is relatively preserved until relatively late in the adult life span (Fjell et al., 2014; Fjell et al., 2013). Thus, theories of adult brain development, supported by neuropsychological and structural neuroimaging evidence, suggest differential rates of age-related change across cortical and subcortical sub-regions.

Given these differential rates of age-related change in brain structure and cognitive function, it is possible that there are also differential rates of age-related change in dopaminergic function across cortical and subcortical regions. The vast majority of studies examining the correlations between age and dopamine have reported linear declines in non-displaceable binding potential (BP<sub>ND</sub>) in D2-like receptors in striatal regions (e.g. (Bäckman & Farde, 2001; Inoue et al., 2001)), with only a handful of studies examining BP<sub>ND</sub> in frontal regions (e.g. (Kaasinen et al., 2000; Ouchi et al., 1999)). Specifically, studies of D2-like receptor BP<sub>ND</sub> report wide-ranging age-related effects, ranging from slightly negative (Kim et al., 2011) to strongly negative (Bäckman et al., 2000). A recent meta-analysis shows strongly negative effects of adult age on D2-like receptors in both frontal ( $r = -.66$ ) and striatal ( $r = -.54$ ) regions (Karrer, Josef, Mata, Morris, & Samanez-Larkin, 2017). In part because of the limited ability for D2 radiotracers (with varying affinities) to capture receptor availability in both receptor dense (striatum) and sparse (frontal cortex) areas in the same scan session and the relatively low spatial resolution of many PET scanners, the vast majority of these studies have used large regions of interest (ROIs) spanning the whole frontal lobe or striatum. Few studies have examined the potential differences between sub-regions within these relatively large structures. Further, these prior studies did not use partial volume correction, which given the differential rates of age-related gray matter atrophy, could impact BP<sub>ND</sub> levels.

Thus, in the present study we examined regional age differences in dopamine BP<sub>ND</sub> across adulthood in cortical and subcortical sub-regions. We examined partial volume corrected (PVC) dopamine BP<sub>ND</sub> of D2-like receptors in two cross-sectional, adult life-span studies. Using [<sup>18</sup>F]Fallypride, which provides broad coverage throughout both cortical and subcortical regions (Slifstein et al., 2004), allowed us to explore regional age differences in the dopamine system across the brain. Study 1 ( $N = 84$ ) included participants continuously sampled across the adult life span and Study 2 ( $N = 48$ ) included an extreme-group design with younger adults and older middle-aged adults. This combination of data sets, with an over-sampling of middle-aged adults, facilitated examination of differential and nonlinear regional age differences in the dopamine system. These nonlinear effects could be important if rates of change accelerate or decelerate with age. On the basis of theories of adult brain development described above, we hypothesized that BP<sub>ND</sub> in most regions would show strong, negative effects of age, with steeper declines in lateral and frontal regions than in medial and posterior regions. There is also some limited evidence for linear declines in dopaminergic function with age in the hippocampus (Kaasinen et al., 2000; Stemmelin, Lazarus, Cassel, Kelche, & Cassel, 2000). However, based on anatomical studies, we hypothesized that BP<sub>ND</sub> in the hippocampus would display preservation across most of adulthood with accelerated decline in old age.

## Methods

Both data sets (Study 1 and Study 2) were collected as part of large-scale multimodal neuroimaging projects focused on decision making. Subsets of the Study 1 behavioral (Seaman et al., 2016), fMRI (Seaman et al., 2018) and PET (Dang et al., 2017; Dang et al., 2016; Smith et al., 2017) data were previously included in other publications. Specifically, age effects on D2-like BP<sub>ND</sub> in a subset of Study 1 participants were reported or noted in three previous publications (Dang et al., 2017; Dang et al., 2016; Smith et al., 2017). However, these were limited to non-PVC striatal ROIs (Dang et al., 2017; Dang et al., 2016) or very large cortical ROIs (i.e., frontal cortex, parietal cortex) that averaged across all gyri within a lobe (Smith et al., 2017). Here we focus on *regional* age differences in partial-volume corrected D2-like receptor

BP<sub>ND</sub> across the adult life span using the full sample from Study 1 (not previously reported) and a new study (Study 2).

*Participants.* For both studies, volunteers were recruited from the Nashville community for a multiday, multimodal neuroimaging study of decision making using the Vanderbilt School of Medicine subject database of healthy adults, Research Match ([www.researchmatch.org](http://www.researchmatch.org)), and a combination of newspaper, radio, and local TV advertisements. All participants were mentally and physically healthy; exclusion criteria included a history of psychiatric illness, head trauma, any significant medical condition, pregnancy, substance abuse, or any condition that would interfere with MRI (e.g. claustrophobia or metal implants). For Study 1, of the 92 adult volunteers recruited, a total of 84 participants ( $M = 49.43$ , Range = 22 to 83 years old) completed both MRI and PET scans. For Study 2, of the 73 volunteers recruited, 48 participants ( $M = 41.40$ , Range = 20 – 65 years old) completed MRI and baseline PET scans. Study 2 participants additionally completed a second [<sup>18</sup>F]fallypride PET scan after taking oral d-amphetamine to measure dopamine release, and a third PET scan using [<sup>18</sup>F]FE-PE2I to measure dopamine transporter availability. The dopamine release and transporter data are not included here. All participants gave written informed consent and were compensated \$350 for Study 1 and \$370-675 depending on (1) task performance, (2) the number of PET scans completed and (3) time spent on the study for Study 2. Approval for all methods was obtained from the Vanderbilt University Human Research Protection Program and the Radioactive Drug Research Committee.

*Cognitive Assessment.* Participants completed a battery of neuropsychological assessments during a separate session to verify that they had normal cognitive abilities. Mean performance on this test battery, as well as the correlation of each measure with age, is displayed in Table 1. Participants in both studies displayed normal performance on cognitive tests. In Study 1 we found the expected age differences in measures of fluid intelligence (e.g. Digit Span) and maintenance of crystallized intelligence (e.g. Vocabulary) across the adult life span. In Study 2, there were no significant differences in performance on cognitive tests between younger and middle-aged adults.

*PET data acquisition and processing.* PET imaging was collected at Vanderbilt University Medical Center. [<sup>18</sup>F]Fallypride was produced by the PET radiochemistry laboratory following the synthesis and quality control guidelines described in US Food and Drug Administration IND 47,245. A 5.0 mCi slow bolus injection of [<sup>18</sup>F]Fallypride was followed by three, 3D emission scans in a GE Discovery STE scanner (3.25mm axial slices with in-plane pixel dimensions of 2.3x2.3mm). Prior to each emission scan, CT scans were collected for attenuation correction. Scanning lasted for approximately 3.5 hours, with two 15-minute breaks for participant comfort. Decay, attenuation, motion, and partial volume correction was performed on the PET scans and voxelwise BP<sub>ND</sub> maps, which represent the ratio of specifically-bound [<sup>18</sup>F]Fallypride to its free concentration, were calculated using the PMOD Biomedical Imaging Quantification software (see (Dang et al., 2016; Smith et al., 2017) for greater detail).

*MRI data acquisition.* Structural MRI scans were collected using a 3-T Phillips Intera Achieva MRI scanner using a 32-channel head coil. T1- weighted high-resolution anatomical scans (repetition time = 8.9 ms, echo time = 4.6 ms, field of view = 256 x 256, voxel dimensions = 1 x 1 x 1 mm) were obtained for each participant. These structural scans facilitated co-registration and spatial normalization of the PET data.

*Partial volume correction.* Using the Hammers atlas (Gousias et al., 2008; Hammers et al., 2003), both MRI and PET data were parcellated into 62 bilateral cortical, 12 bilateral subcortical, 3 posterior fossa, 5 ventricle, and 1 white matter regions of interest (a total of 83

regions). Following parcellation, the MRI and PET data were co-registered, PET data was resampled to MRI space, and then the partial volume correction (PVC) procedure available in PMOD's PNEURO module was applied to the PET data. Time activity curves (TACs) from each region were extracted from the PET data after PVC and fit with a simplified reference tissue model (Lammertsma & Hume, 1996) using PMOD's PKIN module where the bilateral cerebellum was used as the reference region (see Smith et al., 2017 for greater detail).

*Regions of Interest* Prior to analysis, brainstem, white matter, occipital lobes, and ventricles were excluded from consideration for analysis because these regions have no or extremely low levels of dopamine receptors. The cerebellum was also excluded because it was used as the reference region in the TAC modeling. To further limit the number of analyses, for each region of interest (ROI) we calculated the bilateral average  $BP_{ND}$  within each participant, giving a total of 33 bilateral ROIs. Within each study, we screened these bilateral  $BP_{ND}$  averages for outliers, cutting any values that were more than 1.5 times outside the interquartile range (Study 1:  $M = 3.15$ , Range = 0 to 17 participants excluded in each ROI, Study 2:  $M=2.08$ , Range = 0 to 8 participants excluded in each ROI). Because no specific binding would be expected in white matter, we assumed white matter  $BP_{ND}$  values represent non-physiological noise. For Study 1, white matter  $BP_{ND}$  was  $0.49 \pm 0.13$  while for Study 2 white matter  $BP_{ND}$  was  $0.56 \pm 0.20$ . Regions with mean corrected  $BP_{ND}$  values at or below these white matter values in either study were excluded from analyses. In Study 1, eleven regions were below the white matter  $BP_{ND}$  mean (middle frontal gyrus, precentral gyrus, anterior orbital gyrus, inferior frontal gyrus, superior frontal gyrus, lateral orbital gyrus, postcentral gyrus, superior parietal gyrus, inferiolateral remainder of parietal lobe, anterior cingulate gyrus and posterior cingulate gyrus ROIs) while in Study 2 no ROIs were below the white matter  $BP_{ND}$  mean. In many of these regions, these  $BP_{ND}$  values reflect that with aging, the levels of  $BP_{ND}$  drop below the noise floor. This left us with 22 bilateral ROIs, which are analyzed below. Pictures, scatterplots, and statistics for each ROI are available in an interactive app online at <http://13.58.222.229:3838/agebp/>. Data and code are available online at <https://github.com/klsea/agebp> or [https://osf.io/h67k4/?view\\_only=7f99796797894a1085d42b69c4d621c5](https://osf.io/h67k4/?view_only=7f99796797894a1085d42b69c4d621c5).

## Results

*Average binding across regions of interest.* Means and standard deviations of PVC-corrected  $BP_{ND}$  for each ROI are displayed in Table 2. As expected,  $BP_{ND}$  was highest in the striatum (ventral striatum: 37.16, putamen: 33.02, caudate: 26.9). The next highest  $BP_{ND}$  was observed in other medial and subcortical regions, but many of these values were an order of magnitude lower (pallidum: 14.83, subcallosal area: 9.23, insula: 2.44, thalamus: 2.43, amygdala: 3.02). The remaining frontal and temporal ROIs had mean  $BP_{ND}$  between 0.59 and 1.67. Because the two studies differed significantly in average  $BP_{ND}$  in most regions (Table 2), our baseline model included study, along with sex, which may affect D2 receptor availability (Pohjalainen, Rinne, Nägren, Syvälahti, & Hietala, 1998), as control variables. Age effects were tested with linear regressions carried out using the lmer package in R.

*Relative strength of linear age effects.* The largest raw age slopes (unstandardized coefficients from linear regression) were observed in striatal regions with smaller slopes in frontal and temporal regions with no age differences in subcallosal frontal cortex, pallidum, or hippocampus (Figure 1). However, since mean  $BP_{ND}$  differed by orders of magnitude across regions, unstandardized regression slopes (i.e., unit difference in  $BP_{ND}$  per year difference in age) were not directly comparable. The point estimates for each age slope (collapsing across but

not controlling for sex and study) in each region were converted to percentage differences per decade and then qualitatively compared across regions (rightmost column in Table 2). Estimated percentage differences in receptor  $BP_{ND}$  by age decade (linear effects) were highest in most temporal and frontal cortical regions (~6–9% per decade), moderate in parahippocampal gyrus, pregenual frontal cortex, fusiform gyrus, caudate, putamen, thalamus, and amygdala (~3–5%), and weakest in subcallosal frontal cortex, ventral striatum, pallidum, and hippocampus (~0–2%).

*Non-linear effects of age.*  $BP_{ND}$  in many frontal and temporal cortical regions were best fit by quadratic models (Tables 3–6).  $BP_{ND}$  in the straight gyrus/gyrus rectus, pre-subgenual frontal cortex, medial and posterior orbital gyri, fusiform gyrus, and all lateral temporal cortical regions showed concave-down quadratic effects of age such that  $BP_{ND}$  was reduced in middle age compared to young adulthood but then remained relatively stable (and low) until old age. Similar non-linear effects were observed in the insula and putamen such that there was a reduction in receptors during young adulthood (20–50 years old) that leveled off in middle age and older adulthood (+50 years old).

## Discussion

This paper investigated regional differences in dopamine D2/3 (or D2-like) receptor  $BP_{ND}$  across the adult life span. As expected, the largest estimates of age-related differences per decade were observed in cortical regions (especially frontal and lateral temporal cortex), with more gradual loss of receptors in a subset of more medial cortical and subcortical regions. While we estimated declines of 8–9% in lateral temporal and many frontal cortical regions, we estimated striatal D2-like declines between 1.5 and 5% per decade. The estimates reported here are somewhat lower than those seen in a recent meta-analysis (Karrer et al., 2017), and could be due to our use of partial volume correction, an extremely healthy sample, or both. For instance, prior work from our lab on a subset of data from Study 1 noted that age-related changes in the uncorrected data more closely resemble those seen in the meta-analysis (Smith et al., 2017), while another study showed that compared to more sedentary adults, age-related change in striatal D2  $BP_{ND}$  is less steep in physically active adults (Dang et al., 2017). Thus, the estimated changes reported here likely reflect both the partial volume techniques used and the relative health of our sample.

While there was not strong support for an anterior-posterior gradient (e.g., posterior part of the superior temporal gyrus had the greatest change per decade of ~ 9%), there was partial evidence for a medial/lateral distinction. It was difficult to fully evaluate the medial/lateral hypothesis as we were not able to detect significant binding in most lateral frontal cortical regions because the older subjects often had levels that did not exceed white matter in those areas. Despite the lack of assessment of lateral frontal cortical receptors, we did find partial evidence for relative preservation of more ventromedial aspects of frontal cortex (subcallosal) and subcortex (ventral striatum, pallidum, hippocampus). This set of regions is partially consistent with components of the “core affect” functional network from studies of emotional processing (Lindquist, Wager, Kober, Bliss-Moreau, & Barrett, 2012) and the motivational loop described in anatomical and functional studies of dopaminergic frontostriatal circuits (Haber & Knutson, 2010; Seger & Miller, 2010). One exception is the moderate loss of receptors in the amygdala. One might expect more preservation in the amygdala relative to the hippocampus if the amygdala was primarily supporting affective function. Regardless, the relative preservation of dopaminergic function in the other medial regions may possibly account for the relative preservation of affective and motivational function with age. We conducted exploratory analyses



examining associations between an individual difference measure of relative positive affect (experienced positive minus negative affect) and  $BP_{ND}$  in these regions, but found no significant correlations. Other measures of affective or motivational function may be better associated with individual differences in dopamine receptors or other aspects of dopamine function (e.g., dopamine release rather) in these regions (Buckholtz et al., 2010; Schott et al., 2008; Small, Jones-Gotman, & Dagher, 2003; Zald et al., 2004).

Although the steepest raw age slopes on  $BP_{ND}$  from the linear regressions were found in striatal regions, binding was also extremely high in these regions. Thus, even a large effect of age meant that the oldest adults still had relatively high levels of binding in striatum. This is why we chose to focus instead on the percentage age difference measures when making relative comparisons across regions. Although the percent per decade estimates did not control for study or sex (since these were dummy-coded categorical variables in the regression analyses), the slopes used to compute the percentage scores were nearly identical to the slopes from analyses that included the study and sex covariates. However, in contrast to the still relatively high levels of binding in older age in striatal regions, in most cortical regions the oldest adults had almost no signal to distinguish from noise (i.e.,  $BP_{ND}$  approaching the binding values observed in white matter where there are no receptors). This was the case especially for regions showing curvilinear age effects where signal approached noise values as early as middle age. In fact, the evidence for these curvilinear effects may be confounded somewhat by a floor effect given that  $BP_{ND}$  has a lower bound of 0. An exception to this is the curvilinear effect in the putamen where the lowest values do not come close to approaching noise values. Much of the putamen is connected to the pre/motor cortex and lateral prefrontal cortex, and these corticostriatal loops are thought to mediate both motor and fluid cognitive abilities (Seger & Miller, 2010). Thus age-related change in the putamen is consistent with both age-related motor slowing and age-related change in executive function and cognitive control (Rubin, 1999). However, smaller ROIs that isolated subareas more connected with lateral and motor cortex would be needed to fully evaluate this explanation.

We found little evidence to support change in  $BP_{ND}$  in the hippocampus. This was somewhat unexpected, as studies of gray matter volume have documented both declines (Raz et al., 2010) and accelerated declines (Fjell et al., 2013) in both cross-sectional and longitudinal data. There is also some evidence for age-related decline in hippocampal dopamine receptors in human and non-human animals (Stemmelin et al 2000; Kaasinen et al 2000). However, the previous evidence from human PET imaging did not use partial volume correction; thus, age effects on  $BP_{ND}$  may have been somewhat confounded by age differences in gray matter volume. It is possible that there are age-related declines in hippocampal  $BP_{ND}$ , but we were unable to detect them due to our sample size, restricted range in  $BP_{ND}$ , and/or under-sampling of adults over the age of 65. In particular, given the greater variability in old-old age, future studies would benefit from over-sampling at the upper end of the human age range (Samanez-Larkin & D'Esposito, 2008). However, if there is true preservation of D2-like receptors in the hippocampus this would be an intriguing effect and would be consistent with the suggestion that age-related memory deficits, which are often thought to be due to decline of the medial temporal lobes, are actually mediated by age-related changes in more frontal and/or lateral regions (Buckner, 2004).

There are important statistical caveats to the results reported here. In addition to study differences in average  $BP_{ND}$ , there was a significant difference in the average age between the two studies (Study 1:  $M = 49.43$  years old; Study 2:  $M = 41.40$  years old). Thus, because study

and age are correlated with each other and we controlled for study in our models, the slopes reported in this manuscript may under-estimate age effects. Also, the inflection points of many of the best-fitting quadratic models (e.g. in the majority of the frontal lobes, lateral temporal lobes, the fusiform gyrus and the insula) was in early middle-age (between ages 35-45). This is earlier than we predicted based on longitudinal studies of gray matter volume, which suggested the inflection point is in the mid-fifties (Raz et al., 2005), and corresponds to an age range not included in Study 2. Future studies are need to determine if these inflection points are true age effects, an artifact of floor effects (as mentioned above), and/or the result of under-sampling of this age range in these samples.

One major limitation of this study is that it was cross-sectional in nature. The estimates of age differences reported here (e.g., percentage change per decade), and in the PET literature generally, are based on the assumption that cross-sectional studies accurately represent developmental trends. Until verified with longitudinal data, it remains possible that the age-related changes in dopaminergic function are at least partially a result of cohort effects. Longitudinal studies of gray matter volume have estimated that cross-sectional studies can under-estimate the influence of aging (Raz et al., 2005) and similar longitudinal studies are necessary to determine to what extent this occurs in studies of the dopaminergic system. A longitudinal study is currently underway that should be able to address this question (Nevalainen et al., 2015). A second limitation of this study is that it focuses exclusively on D2-like receptor  $BP_{ND}$ , without considering age-related changes in D1-like receptor binding, dopamine transporters, dopamine synthesis capacity, or dopamine release. Each of these measures a distinct aspect of dopaminergic function, and by focusing on D2-like receptors, we are likely to be missing important aspects of age-related change or stability elsewhere in the system. For example, synthesis capacity appears to remain stable with age (Karrer et al., 2017), although the regional variation of this effect has not been systematically evaluated yet.

Collectively, the data presented here suggests that dopamine  $BP_{ND}$  does not show the same regional pattern of age-related changes observed in studies of gray matter volume and white matter integrity. There was somewhat surprising evidence for preservation of dopaminergic function well into older age in a subset of ventromedial cortical and subcortical brain regions. These results may help clarify one paradox of aging: namely, that some dopamine-mediated cognitive functions are preserved with age while others show marked decline. While there are clearly age-related differences in dopaminergic function across the adult life span, these changes in function are not uniform and they do not show the same regional pattern of change than has been observed using other neuroimaging methods. New theories of adult brain development are needed that incorporate these and other challenging results. Hopefully these findings inspire future studies that could be used to modify existing or propose new theories of human brain aging that better account for the differential changes in cognitive, affective, and motivational functions across adulthood.

## Tables

Table 1  
*Participant Characteristics*

| Variable                                      | Study 1 (N=84) |                             | Study 2 (N=48) |              |                                |
|-----------------------------------------------|----------------|-----------------------------|----------------|--------------|--------------------------------|
|                                               | M (SD)         | <i>r</i> [95% CI] with age  | YA<br>M (SD)   | MA<br>M (SD) | Group t-value<br>[95% CI]      |
| Age                                           | 49.43 (17.64)  |                             | 25.78 (2.61)   | 55.65 (3.72) |                                |
| Gender                                        | 48F/36M        |                             | 12F/11M        | 10F/10M      |                                |
| Digit Span <sup>a</sup>                       | 16.12 (3.96)   | <b>-0.28 [-0.47, -0.07]</b> | 20.52 (3.95)   | 21.85 (4.13) | 1.07 [ -1.18 , 3.83 ]          |
| Numeracy <sup>a</sup>                         | 11.81 (3.24)   | <b>-0.27 [-0.46, -0.06]</b> | 12.52 (1.5)    | 15.35 (7.88) | 1.58 [ -0.9 , 6.56 ]           |
| Paired Associates Delayed Recall <sup>b</sup> | 5.85 (2.34)    | <b>-0.61 [-0.73, -0.45]</b> | 7.22 (1.62)    | 5.95 (2.14)  | <b>-2.16 [ -2.46 , -0.08 ]</b> |
| Shipley Vocabulary Subscale <sup>a</sup>      | 33.67 (5.39)   | 0.15 [-0.07, 0.35]          | 33.3 (3.46)    | 32.1 (9)     | -0.56 [ -5.62 , 3.21 ]         |

*Notes.* Digit Span and Paired Associates Delayed Recall from the WMS-III, Wechsler Memory Scale-Third Edition, (Wechsler, 1997); Numeracy, (Peters, Dieckmann, Dixon, Hibbard, & Mertz, 2007); Shipley Vocabulary Subscale, (Shipley, 1940); Trails Test, (Corrigan & Hinkeldey, 1987).

YA = Younger adults; MA = older Middle Aged adults

Significant correlations denoted in bold.

No significant group differences in Study 2.

<sup>a</sup>Digit Span, Vocabulary, and Numeracy were not recorded for one participant in Study 1.

<sup>b</sup>Delayed Recall not recorded for five participants in Study 1.

**Table 2.** Mean (SD) and percent change per decade for D2-like receptor availability (BPND) across two studies using [18F]Fallypride PET. Significant differences are denoted in bold. Percent age-related difference per decade was calculated by fitting a simple linear model with age as the only predictor. FL = frontal lobe, TL = temporal lobe, BG = basal ganglia

| Region                                       | Overall<br><i>M (SD)</i> | Study 1<br><i>M (SD)</i> | Study 2<br><i>M (SD)</i> | <i>t</i> -value<br>[95% CI]    | % age-<br>related<br>difference<br>per decade |
|----------------------------------------------|--------------------------|--------------------------|--------------------------|--------------------------------|-----------------------------------------------|
| Superior temporal gyrus, posterior part (TL) | 0.82 ( 0.39 )            | 0.7 ( 0.32 )             | 1.05 ( 0.42 )            | <b>4.88 [ 0.21 , 0.49 ]</b>    | -9.3                                          |
| Subgenual frontal cortex (FL)                | 1.01 ( 0.55 )            | 0.72 ( 0.35 )            | 1.53 ( 0.43 )            | <b>10.71 [ 0.66 , 0.97 ]</b>   | -8.42                                         |
| Superior temporal gyrus, anterior part (TL)  | 1.44 ( 0.52 )            | 1.26 ( 0.4 )             | 1.75 ( 0.56 )            | <b>5.29 [ 0.3 , 0.67 ]</b>     | -8.06                                         |
| Anterior temporal lobe, lateral part (TL)    | 1.67 ( 0.48 )            | 1.56 ( 0.37 )            | 1.86 ( 0.59 )            | <b>3.21 [ 0.12 , 0.49 ]</b>    | -7.01                                         |
| Posterior temporal lobe (TL)                 | 0.81 ( 0.35 )            | 0.72 ( 0.31 )            | 0.98 ( 0.35 )            | <b>4.12 [ 0.13 , 0.38 ]</b>    | -6.52                                         |
| Middle and inferior temporal gyrus (TL)      | 1.4 ( 0.45 )             | 1.29 ( 0.36 )            | 1.59 ( 0.54 )            | <b>3.49 [ 0.13 , 0.48 ]</b>    | -6.51                                         |
| Straight gyrus (FL)                          | 1.23 ( 0.44 )            | 1.05 ( 0.34 )            | 1.52 ( 0.43 )            | <b>6.39 [ 0.32 , 0.62 ]</b>    | -6.42                                         |
| Anterior temporal lobe, medial part (TL)     | 1.64 ( 0.45 )            | 1.5 ( 0.35 )             | 1.89 ( 0.5 )             | <b>4.8 [ 0.23 , 0.56 ]</b>     | -6.38                                         |
| Insula                                       | 2.44 ( 0.64 )            | 2.33 ( 0.57 )            | 2.64 ( 0.7 )             | <b>2.63 [ 0.08 , 0.56 ]</b>    | -6.37                                         |
| Posterior orbital gyrus (FL)                 | 0.94 ( 0.39 )            | 0.78 ( 0.31 )            | 1.19 ( 0.37 )            | <b>6.32 [ 0.28 , 0.54 ]</b>    | -5.98                                         |
| Medial orbital gyrus (FL)                    | 1.19 ( 0.38 )            | 1.03 ( 0.29 )            | 1.45 ( 0.38 )            | <b>6.64 [ 0.3 , 0.55 ]</b>     | -5.78                                         |
| Caudate nucleus (BG)                         | 26.9 ( 5.2 )             | 25.92 ( 5.15 )           | 28.64 ( 4.87 )           | <b>2.98 [ 0.91 , 4.51 ]</b>    | -5.22                                         |
| Parahippocampal and ambient gyri (TL)        | 0.8 ( 0.27 )             | 0.71 ( 0.18 )            | 0.96 ( 0.33 )            | <b>4.96 [ 0.15 , 0.36 ]</b>    | -5.08                                         |
| Pre-subgenual frontal cortex (FL)            | 0.59 ( 0.24 )            | 0.52 ( 0.2 )             | 0.74 ( 0.25 )            | <b>5.2 [ 0.14 , 0.31 ]</b>     | -4.47                                         |
| Fusiform gyrus (TL)                          | 1.62 ( 0.39 )            | 1.55 ( 0.35 )            | 1.75 ( 0.44 )            | <b>2.52 [ 0.04 , 0.35 ]</b>    | -4.31                                         |
| Putamen (BG)                                 | 33.02 ( 4.87 )           | 32.7 ( 5.09 )            | 33.63 ( 4.41 )           | 1.09 [ -0.77 , 2.64 ]          | -3.62                                         |
| Amygdala (MTL)                               | 3.02 ( 0.65 )            | 3.2 ( 0.64 )             | 2.69 ( 0.56 )            | <b>-4.79 [ -0.72 , -0.3 ]</b>  | -2.73                                         |
| Thalamus (BG)                                | 2.43 ( 0.39 )            | 2.4 ( 0.34 )             | 2.47 ( 0.47 )            | 0.85 [ -0.09 , 0.22 ]          | -2.7                                          |
| Subcallosal area (FL)                        | 9.23 ( 3.88 )            | 9.86 ( 3.79 )            | 8.03 ( 3.82 )            | <b>-2.53 [ -3.27 , -0.39 ]</b> | -1.78                                         |
| Ventral striatum (BG)                        | 37.16 ( 8.01 )           | 39.21 ( 7.66 )           | 33.33 ( 7.27 )           | <b>-4.3 [ -8.6 , -3.17 ]</b>   | -1.43                                         |
| Hippocampus (MTL)                            | 1.34 ( 0.43 )            | 1.47 ( 0.44 )            | 1.11 ( 0.3 )             | <b>-5.45 [ -0.48 , -0.23 ]</b> | -0.83                                         |
| Pallidum (BG)                                | 14.83 ( 3.47 )           | 15.84 ( 3.28 )           | 13.13 ( 3.12 )           | <b>-4.69 [ -3.86 , -1.57 ]</b> | -0.18                                         |

Table 3  
 Multiple Linear Regression Analyses of Frontal and Insula ROI's Age-related change in D2-like receptor availability (BP<sub>ND</sub>) using [18F]Fallypride PET.

|                 | Parameter    | Medial orbital gyrus      | Posterior orbital gyrus     | Pre-subgenual frontal cortex | Straight gyrus              | Subcallosal area        | Subgenual frontal cortex  | Insula                      |
|-----------------|--------------|---------------------------|-----------------------------|------------------------------|-----------------------------|-------------------------|---------------------------|-----------------------------|
| Baseline Model  | $R^2$        | 0.283***                  | 0.252***                    | 0.184***                     | 0.263***                    | 0.039*                  | 0.506***                  | 0.043*                      |
| Linear Model    |              | <b>-0.0057</b>            | <b>-0.0043</b>              | -0.0016                      | <b>-0.007</b>               | -0.031                  | <b>-0.0067</b>            | <b>-0.018</b>               |
|                 | Age          | <b>[-0.009, -0.0024 ]</b> | <b>[-0.0078, -0.00086 ]</b> | [-0.0039, 7e-04 ]            | <b>[-0.011, -0.0032 ]</b>   | [-0.071, 0.0087 ]       | <b>[-0.011, -0.0027 ]</b> | <b>[-0.024, -0.012 ]</b>    |
|                 | $R^2$ change | 0.063***                  | 0.036*                      | 0.012                        | 0.072***                    | 0.019                   | 0.042**                   | 0.214***                    |
| Quadratic Model |              | <b>-0.038</b>             | <b>-0.028</b>               | <b>-0.016</b>                | <b>-0.041</b>               | -0.077                  | <b>-0.029</b>             | <b>-0.065</b>               |
|                 | Age          | <b>[-0.057, -0.019 ]</b>  | <b>[-0.048, -0.0072 ]</b>   | <b>[-0.029, -0.0023 ]</b>    | <b>[-0.062, -0.019 ]</b>    | [-0.32, 0.17 ]          | <b>[-0.053, -0.0057 ]</b> | <b>[-0.099, -0.031 ]</b>    |
|                 |              | <b>0.00034 [</b>          | <b>0.00024</b>              | <b>0.00015</b>               | <b>0.00035</b>              | <b>0.00049</b>          | 0.00024                   | <b>5e-04</b>                |
|                 | Age2         | <b>0.00014, 0.00054 ]</b> | <b>[ 3.3e-05, 0.00046 ]</b> | <b>[ 9.7e-06, 0.00029 ]</b>  | <b>[ 0.00013, 0.00058 ]</b> | <b>[-0.002, 0.003 ]</b> | <b>[-7e-06, 0.00048 ]</b> | <b>[ 0.00015, 0.00085 ]</b> |
|                 | $R^2$ change | 0.057***                  | 0.03*                       | 0.028*                       | 0.047**                     | 0.001                   | 0.013                     | 0.044**                     |

*Notes*

Significant effects are denoted in bold.

\*  $p < .05$ . \*\*  $p < .01$ . \*\*\*  $p < .001$ .

Table 4

Multiple Linear Regression Analyses of Basal Ganglia ROI's Age-related change in D2-like receptor availability (BP<sub>ND</sub>) using [<sup>18</sup>F]Fallypride PET.

| Model     | Parameter        | Caudate nucleus                   | Pallidum             | Putamen                            | Thalamus                             | Ventral striatum                   |
|-----------|------------------|-----------------------------------|----------------------|------------------------------------|--------------------------------------|------------------------------------|
| Baseline  | $R^2$            | 0.055*                            | 0.151***             | -0.007                             | 0.02                                 | 0.124***                           |
|           | Linear           | <b>-0.15</b>                      | -0.022               | <b>-0.13</b>                       | <b>-0.0071</b>                       | <b>-0.1</b>                        |
| Quadratic | Age              | [ <b>-0.2,</b><br><b>-0.11</b> ]  | [ -0.055,<br>0.011 ] | [ <b>-0.18,</b><br><b>-0.088</b> ] | [ <b>-0.011,</b><br><b>-0.0033</b> ] | [ <b>-0.18,</b><br><b>-0.027</b> ] |
|           | $R^2$ change     | 0.248***                          | 0.011                | 0.212***                           | 0.097***                             | 0.047**                            |
|           | Age              | <b>-0.41</b>                      | 0.038                | <b>-0.53</b>                       | -0.014                               | -0.31                              |
|           | Age              | [ <b>-0.68,</b><br><b>-0.14</b> ] | [ -0.16,<br>0.24 ]   | [ <b>-0.79,</b><br><b>-0.27</b> ]  | [ -0.036,<br>0.0091 ]                | [ -0.77,<br>0.15 ]                 |
|           | Age <sup>2</sup> | 0.0027                            | -0.00063             | <b>0.0042</b>                      | 6.8e-05                              | 0.0022                             |
|           | $R^2$ change     | [ -6.9e-05, 0.0055 ]              | [ -0.0027, 0.0014 ]  | [ <b>0.0014, 0.0069</b> ]          | [ -0.00017,<br>3e-04 ]               | [ -0.0026, 0.0069 ]                |
|           |                  | 0.02                              | 0.002                | 0.053**                            | 0.002                                | 0.005                              |

*Notes*

Significant effects are denoted in bold.

\*  $p < .05$ . \*\*  $p < .01$ . \*\*\*  $p < .001$ .

Table 5

Multiple Linear Regression Analyses of Medial Temporal Lobe ROI's Age-related change in D2-like receptor availability (BP<sub>ND</sub>) using [<sup>18</sup>F]Fallypride PET.

|              | Parameter    | Amygdala                              | Anterior temporal lobe<br>medial part | Fusiform<br>gyrus                    | Hippocampus             | Parahippocampal and<br>ambient gyri    |
|--------------|--------------|---------------------------------------|---------------------------------------|--------------------------------------|-------------------------|----------------------------------------|
| Baseline     |              |                                       |                                       |                                      |                         |                                        |
| Model        | R2           | 0.136***                              | 0.169***                              | 0.044*                               | 0.148***                | 0.198***                               |
| Linear Model |              | <b>-0.013</b>                         | <b>-0.011</b>                         | <b>-0.0072</b>                       | -0.0037                 | <b>-0.0033</b>                         |
|              | Age          | [ <b>-0.018,</b><br><b>-0.0066</b> ]  | [ <b>-0.015,</b><br><b>-0.0069</b> ]  | [ <b>-0.011,</b><br><b>-0.0034</b> ] | [ -0.0078,<br>0.00038 ] | [ <b>-0.0058,</b><br><b>-0.00076</b> ] |
|              | R2<br>change | 0.102***                              | 0.162***                              | 0.097***                             | 0.021                   | 0.041*                                 |
| Quadratic    |              | <b>-0.037</b>                         | <b>-0.032</b>                         | <b>-0.037</b>                        | 0.01                    | <b>-0.018</b>                          |
| Model        | Age          | [ <b>-0.072,</b> -<br><b>0.0011</b> ] | [ <b>-0.054,</b><br><b>-0.0091</b> ]  | [ <b>-0.06,</b><br><b>-0.015</b> ]   | [ -0.014,<br>0.035 ]    | [ <b>-0.032,</b><br><b>-0.0029</b> ]   |
|              |              | 0.00026                               | 0.00022                               | 0.00032                              | -0.00015                | 0.00015                                |
|              | Age2         | [ -0.00012,<br>0.00063 ]              | [ -1.4e-05,<br>0.00046 ]              | [ 8.7e-05,<br>0.00055 ]              | [ -4e-04,<br>1e-04 ]    | [ -1.1e-06,<br>3e-04 ]                 |
|              | R2<br>change | 0.011                                 | 0.018                                 | 0.049**                              | 0.009                   | 0.023                                  |

*Notes*

Significant effects are denoted in bold.

\*  $p < .05$ . \*\*  $p < .01$ . \*\*\*  $p < .001$ .

Table 6

Multiple Linear Regression Analyses of Lateral Temporal Lobe ROI's Age-related change in D2-like receptor availability ( $BP_{ND}$ ) using [ $^{18}F$ ]Fallypride PET.

|                 | Parameter | Superior temporal gyrus, anterior part | Anterior temporal lobe, lateral part | Middle and inferior temporal gyrus | Posterior temporal lobe     | Superior temporal gyrus, posterior part |
|-----------------|-----------|----------------------------------------|--------------------------------------|------------------------------------|-----------------------------|-----------------------------------------|
| Baseline Model  | R2        | 0.194***                               | 0.08**                               | 0.091***                           | 0.111***                    | 0.179***                                |
| Linear Model    |           | <b>-0.012</b>                          | <b>-0.01</b>                         | <b>-0.0096</b>                     | <b>-0.0051</b>              | <b>-0.0086</b>                          |
|                 | Age       | <b>[-0.017, -0.0081 ]</b>              | <b>[-0.017, -0.0089 ]</b>            | <b>[-0.014, -0.0055 ]</b>          | <b>[-0.0084, -0.0019 ]</b>  | <b>[-0.012, -0.0053 ]</b>               |
|                 | R2 change | 0.163***                               | 0.209***                             | 0.128***                           | 0.063**                     | 0.137***                                |
| Quadratic Model |           | <b>-0.048</b>                          | <b>-0.049</b>                        | <b>-0.055</b>                      | <b>-0.037</b>               | <b>-0.043</b>                           |
|                 | Age       | <b>[-0.074, -0.023 ]</b>               | <b>[-0.074, -0.025 ]</b>             | <b>[-0.079, -0.032 ]</b>           | <b>[-0.056, -0.018 ]</b>    | <b>[-0.062, -0.023 ]</b>                |
|                 |           | <b>0.00038</b>                         | <b>0.00038</b>                       | <b>0.00048</b>                     | <b>0.00034</b>              | <b>0.00036</b>                          |
|                 | Age2      | <b>[ 0.00012, 0.00064 ]</b>            | <b>[ 0.00013, 0.00064 ]</b>          | <b>[ 0.00024, 0.00073 ]</b>        | <b>[ 0.00014, 0.00053 ]</b> | <b>[ 0.00016, 0.00056 ]</b>             |
|                 | R2 change | 0.039**                                | 0.046**                              | 0.082***                           | 0.07***                     | 0.06***                                 |

*Notes*

Significant effects are denoted in bold.

\*  $p < .05$ . \*\*  $p < .01$ . \*\*\*  $p < .001$ .



## Figure Caption

*Figure 1: Linear and quadratic effects of Age on D2-BPND in select regions of interest. Pictures, scatterplots, and statistics for each ROI are available in an interactive app online at <http://13.58.222.229:3838/agebp/>*

## References

- Bäckman, L., & Farde, L. (2001). Dopamine and cognitive functioning: Brain imaging findings in Huntington's disease and normal aging. *Scandinavian Journal of Psychology*, *42*(3), 287-296. doi:10.1111/1467-9450.00238
- Bäckman, L., Ginovart, N., Dixon, R. A., Wahlin, T.-B. R., Wahlin, Å., Halldin, C., & Farde, L. (2000). Age-related cognitive deficits mediated by changes in the striatal dopamine system. *American Journal of Psychiatry*, *157*(4), 635-637. doi:10.1176/appi.ajp.157.4.635
- Bäckman, L., Lindenberger, U., Li, S.-C., & Nyberg, L. (2010). Linking cognitive aging to alterations in dopamine neurotransmitter functioning: recent data and future avenues. *Neuroscience & Biobehavioral Reviews*, *34*(5), 670-677. doi:10.1016/j.neubiorev.2009.12.008
- Bäckman, L., Nyberg, L., Lindenberger, U., Li, S.-C., & Farde, L. (2006). The correlative triad among aging, dopamine, and cognition: current status and future prospects. *Neuroscience & Biobehavioral Reviews*, *30*(6), 791-807. doi:10.1016/j.neubiorev.2006.06.005
- Bennett, I. J., Madden, D. J., Vaidya, C. J., Howard, D. V., & Howard, J. H. (2010). Age-related differences in multiple measures of white matter integrity: A diffusion tensor imaging study of healthy aging. *Human Brain Mapping*, *31*(3), 378-390. doi:10.1002/hbm.20872
- Buckholtz, J. W., Treadway, M. T., Cowan, R. L., Woodward, N. D., Li, R., Ansari, M. S., . . . Smith, C. E. (2010). Dopaminergic network differences in human impulsivity. *Science*, *329*(5991), 532-532. doi:10.1126/science.1185778
- Buckner, R. L. (2004). Memory and executive function in aging and AD: multiple factors that cause decline and reserve factors that compensate. *Neuron*, *44*(1), 195-208. doi:10.1016/j.neuron.2004.09.006
- Carstensen, L. L. (2006). The influence of a sense of time on human development. *Science*, *312*(5782), 1913-1915. doi:10.1126/science.1127488
- Carstensen, L. L., & Mikels, J. A. (2005). At the intersection of emotion and cognition: Aging and the positivity effect. *Current Directions in Psychological Science*, *14*(3), 117-121. doi:10.1111/j.0963-7214.2005.00348.x
- Charles, S. T., Mather, M., & Carstensen, L. L. (2003). Aging and emotional memory: The forgettable nature of negative images for older adults. *Journal of Experimental Psychology: General*, *132*(2), 310-324. doi:10.1037/0096-3445.132.2.310
- Corrigan, J. D., & Hinkeldey, N. S. (1987). Relationships between parts A and B of the Trail Making Test. *Journal of Clinical Psychology*, *43*(4), 402-409. doi:10.1002/1097-4679(198707)43:4<402::aid-jclp2270430411>3.0.co;2-e
- Dang, L. C., Castellon, J. J., Perkins, S. F., Le, N. T., Cowan, R. L., Zald, D. H., & Samanez-Larkin, G. R. (2017). Reduced effects of age on dopamine D2 receptor levels in physically active adults. *Neuroimage*, *148*, 123-129. doi:10.1016/j.neuroimage.2017.01.018
- Dang, L. C., Samanez-Larkin, G. R., Castellon, J. J., Perkins, S. F., Cowan, R. L., & Zald, D. H. (2016). Associations between dopamine D2 receptor availability and BMI depend on age. *Neuroimage*, *138*, 176-183.
- Davis, S. W., Dennis, N. A., Buchler, N. G., White, L. E., Madden, D. J., & Cabeza, R. (2009). Assessing the effects of age on long white matter tracts using diffusion tensor tractography. *Neuroimage*, *46*(2), 530-541. doi:10.1016/j.neuroimage.2009.01.068

- Fjell, A. M., Walhovd, K. B., Fennema-Notestine, C., McEvoy, L. K., Hagler, D. J., Holland, D., . . . Dale, A. M. (2009). One-year brain atrophy evident in healthy aging. *Journal of Neuroscience*, *29*(48), 15223-15231.
- Fjell, A. M., Westlye, L. T., Grydeland, H., Amlien, I., Espeseth, T., Reinvang, I., . . . Initiative, A. D. N. (2014). Accelerating cortical thinning: unique to dementia or universal in aging? *Cerebral Cortex*, *24*(4), 919-934. doi:10.1093/cercor/bhs379
- Fjell, A. M., Westlye, L. T., Grydeland, H., Amlien, I., Espeseth, T., Reinvang, I., . . . Walhovd, K. B. (2013). Critical ages in the life course of the adult brain: Nonlinear subcortical aging. *Neurobiology of Aging*, *34*(10), 2239-2247. doi:10.1016/j.neurobiolaging.2013.04.006
- Gousias, I. S., Rueckert, D., Heckemann, R. A., Dyet, L. E., Boardman, J. P., Edwards, A. D., & Hammers, A. (2008). Automatic segmentation of brain MRIs of 2-year-olds into 83 regions of interest. *Neuroimage*, *40*(2), 672-684. doi:10.1016/j.neuroimage.2007.11.034
- Greenwood, P. M. (2000). The frontal aging hypothesis evaluated. *Journal of the International Neuropsychological Society*, *6*(6), 705-726. doi:10.1017/s1355617700666092
- Haber, S. N., & Knutson, B. (2010). The reward circuit: Linking primate anatomy and human imaging. *Neuropsychopharmacology*, *35*(1), 4. doi:10.1038/npp.2009.129
- Hammers, A., Allom, R., Koeppe, M. J., Free, S. L., Myers, R., Lemieux, L., . . . Duncan, J. S. (2003). Three-dimensional maximum probability atlas of the human brain, with particular reference to the temporal lobe. *Human Brain Mapping*, *19*(4), 224-247. doi:10.1002/hbm.10123
- Inoue, M., Suhara, T., Sudo, Y., Okubo, Y., Yasuno, F., Kishimoto, T., . . . Tanada, S. (2001). Age-related reduction of extrastriatal dopamine D2 receptor measured by PET. *Life Sciences*, *69*(9), 1079-1084. doi:10.1016/s0024-3205(01)01205-x
- Kaasinen, V., Vilkmann, H., Hietala, J., Någren, K., Helenius, H., Olsson, H., . . . Rinne, J. O. (2000). Age-related dopamine D2/D3 receptor loss in extrastriatal regions of the human brain. *Neurobiology of Aging*, *21*(5), 683-688. doi:10.1016/s0197-4580(00)00149-4
- Karrer, T. M., Josef, A. K., Mata, R., Morris, E. D., & Samanez-Larkin, G. R. (2017). Reduced dopamine receptors and transporters but not synthesis capacity in normal aging adults: A meta-analysis. *Neurobiology of Aging*, *57*, 36-46. doi:10.1016/j.neurobiolaging.2017.05.006
- Kim, S. H., Baik, S.-H., Park, C. S., Kim, S. J., Choi, S. W., & Kim, S. E. (2011). Reduced striatal dopamine D2 receptors in people with Internet addiction. *Neuroreport*, *22*(8), 407-411. doi:10.1097/wnr.0b013e328346e16e
- Lammertsma, A. A., & Hume, S. P. (1996). Simplified reference tissue model for PET receptor studies. *Neuroimage*, *4*(3), 153-158. doi:10.1006/nimg.1996.0066
- Lang, F. R., & Carstensen, L. L. (2002). Time counts: future time perspective, goals, and social relationships. *Psychology and Aging*, *17*(1), 125.
- Li, S.-C., Lindenberger, U., Nyberg, L., Heekeren, H. R., & Bäckman, L. (2009). Dopaminergic modulation of cognition in human aging *Imaging the aging brain* (pp. 71-91): Oxford University Press.
- Lindquist, K. A., Wager, T. D., Kober, H., Bliss-Moreau, E., & Barrett, L. F. (2012). The brain basis of emotion: A meta-analytic review. *Behavioral and Brain Sciences*, *35*(3), 121-143. doi:10.1017/s0140525x11000446

- MacPherson, S. E., Phillips, L. H., & Della Sala, S. (2002). Age, executive function and social decision making: A dorsolateral prefrontal theory of cognitive aging. *Psychology and Aging, 17*(4), 598. doi:10.1037//0882-7974.17.4.598
- Mather, M. (2006). A review of decision-making processes: Weighing the risks and benefits of aging. In L. L. Carstensen & C. R. Hartel (Eds.), *When I'm 64* (pp. 145-173). Washington, DC: National Academies Press.
- McGinnis, S. M., Brickhouse, M., Pascual, B., & Dickerson, B. C. (2011). Age-related changes in the thickness of cortical zones in humans. *Brain Topography, 24*(3-4), 279. doi:10.1007/s10548-011-0198-6
- Nevalainen, N., Riklund, K., Andersson, M., Axelsson, J., Ögren, M., Lövdén, M., . . . Nyberg, L. (2015). COBRA: A prospective multimodal imaging study of dopamine, brain structure and function, and cognition. *Brain Research, 1612*, 83-103. doi:10.1016/j.brainres.2014.09.010
- Ouchi, Y., Yoshikawa, E., Okada, H., Futatsubashi, M., Sekine, Y., Iyo, M., & Sakamoto, M. (1999). Alterations in binding site density of dopamine transporter in the striatum, orbitofrontal cortex, and amygdala in early Parkinson's disease: Compartment analysis for  $\beta$ -CFT binding with positron emission tomography. *Annals of Neurology, 45*(5), 601-610. doi:10.1002/1531-8249(199905)45:5<601::aid-ana8>3.0.co;2-0
- Peters, E., Dieckmann, N., Dixon, A., Hibbard, J. H., & Mertz, C. (2007). Less is more in presenting quality information to consumers. *Medical Care Research and Review, 64*(2), 169-190. doi:10.1177/10775587070640020301
- Pohjalainen, T., Rinne, J. O., Någren, K., Syvälahti, E., & Hietala, J. (1998). Sex differences in the striatal dopamine D2 receptor binding characteristics in vivo. *American Journal of Psychiatry, 155*(6), 768-773. doi:10.1016/j.psychresns.2003.05.001
- Raz, N. (2000). Aging of the brain and its impact on cognitive performance: Integration of structural and functional findings.
- Raz, N., Ghisletta, P., Rodrigue, K. M., Kennedy, K. M., & Lindenberger, U. (2010). Trajectories of brain aging in middle-aged and older adults: Regional and individual differences. *Neuroimage, 51*(2), 501-511. doi:10.1016/j.neuroimage.2010.03.020
- Raz, N., Lindenberger, U., Rodrigue, K. M., Kennedy, K. M., Head, D., Williamson, A., . . . Acker, J. D. (2005). Regional brain changes in aging healthy adults: general trends, individual differences and modifiers. *Cerebral Cortex, 15*(11), 1676-1689. doi:10.1093/cercor/bhi044
- Raz, N., & Rodrigue, K. M. (2006). Differential aging of the brain: Patterns, cognitive correlates and modifiers. *Neuroscience & Biobehavioral Reviews, 30*(6), 730-748. doi:10.1016/j.neubiorev.2006.07.001
- Rubin, D. C. (1999). Frontal-striatal circuits in cognitive aging: evidence for caudate involvement. *Aging, Neuropsychology, and Cognition, 6*(4), 241-259. doi:10.1076/1382-5585(199912)06:04;1-B;FT241
- Samanez-Larkin, G. R., & D'Esposito, M. (2008). Group comparisons: imaging the aging brain. *Social Cognitive and Affective Neuroscience, 3*(3), 290-297. doi:10.1093/scan/nsn029
- Schott, B. H., Minuzzi, L., Krebs, R. M., Elmenhorst, D., Lang, M., Winz, O. H., . . . Zilles, K. (2008). Mesolimbic functional magnetic resonance imaging activations during reward anticipation correlate with reward-related ventral striatal dopamine release. *Journal of Neuroscience, 28*(52), 14311-14319. doi:10.1523/JNEUROSCI.2058-08.2008

- Seaman, K. L., Brooks, N., Karrer, T. M., Castellon, J. J., Perkins, S. F., Dang, L., . . . Samanez-Larkin, G. R. (2018). Subjective Value Representations during Effort, Probability, and Time Discounting across Adulthood. *Social Cognitive and Affective Neuroscience*, nsy021-nsy021. doi:10.1093/scan/nsy021
- Seaman, K. L., Gorlick, M. A., Vekaria, K. M., Hsu, M., Zald, D. H., & Samanez-Larkin, G. R. (2016). Adult age differences in decision making across domains: Increased discounting of social and health-related rewards. *Psychology and Aging*, 31(7), 737-746. doi:10.1037/pag0000131
- Seger, C. A., & Miller, E. K. (2010). Category learning in the brain. *Annual review of neuroscience*, 33, 203-219. doi:10.1016/b978-0-12-397025-1.00274-8
- Shipley, W. C. (1940). A self-administering scale for measuring intellectual impairment and deterioration. *The Journal of Psychology*, 9(2), 371-377. doi:10.1080/00223980.1940.9917704
- Slifstein, M., Hwang, D.-R., Huang, Y., Guo, N., Sudo, Y., Narendran, R., . . . Laruelle, M. (2004). In vivo affinity of [18 F] fallypride for striatal and extrastriatal dopamine D2 receptors in nonhuman primates. *Psychopharmacology*, 175(3), 274-286. doi:10.1002/1098-2396(200010)38:1<71::aid-syn8>3.0.co;2-2
- Small, D. M., Jones-Gotman, M., & Dagher, A. (2003). Feeding-induced dopamine release in dorsal striatum correlates with meal pleasantness ratings in healthy human volunteers. *Neuroimage*, 19(4), 1709-1715. doi:10.1016/S1053-8119(03)00253-2
- Smith, C. T., Crawford, J. L., Dang, L. C., Seaman, K. L., San Juan, M. D., Vijay, A., . . . Morris, E. D. (2017). Partial-volume correction increases estimated dopamine D2-like receptor binding potential and reduces adult age differences. *Journal of Cerebral Blood Flow & Metabolism*, 0271678X17737693.
- Stemmelin, J., Lazarus, C., Cassel, S., Kelche, C., & Cassel, J.C. (2000). Immunohistochemical and neurochemical correlates of learning deficits in aged rats. *Neuroscience*, 96(2), 275-289. doi:10.1016/s0306-4522(99)00561-8
- Sullivan, E. V., & Pfefferbaum, A. (2006). Diffusion tensor imaging and aging. *Neuroscience & Biobehavioral Reviews*, 30(6), 749-761. doi:10.1016/j.neubiorev.2006.06.002
- Wechsler, D. (1997). Wechsler memory scale (WMS-III). San Antonio, TX: The Psychological Corporation.
- West, R. L. (1996). An application of prefrontal cortex function theory to cognitive aging. *Psychological Bulletin*, 120(2), 272. doi:10.1037//0033-2909.120.2.272
- West, R. L. (2000). In defense of the frontal lobe hypothesis of cognitive aging. *Journal of the International Neuropsychological Society*, 6(6), 727-729. doi:10.1017/s1355617700666109
- Yang, Z., Wen, W., Jiang, J., Crawford, J. D., Reppermund, S., Levitan, C., . . . Brodaty, H. (2016). Age-associated differences on structural brain MRI in nondemented individuals from 71 to 103 years. *Neurobiology of Aging*, 40, 86-97. doi:10.1016/j.neurobiolaging.2016.01.006
- Zald, D. H., Boileau, I., El-Dearedy, W., Gunn, R., McGlone, F., Dichter, G. S., & Dagher, A. (2004). Dopamine transmission in the human striatum during monetary reward tasks. *Journal of Neuroscience*, 24(17), 4105-4112. doi:10.1523/JNEUROSCI.4643-03.2004

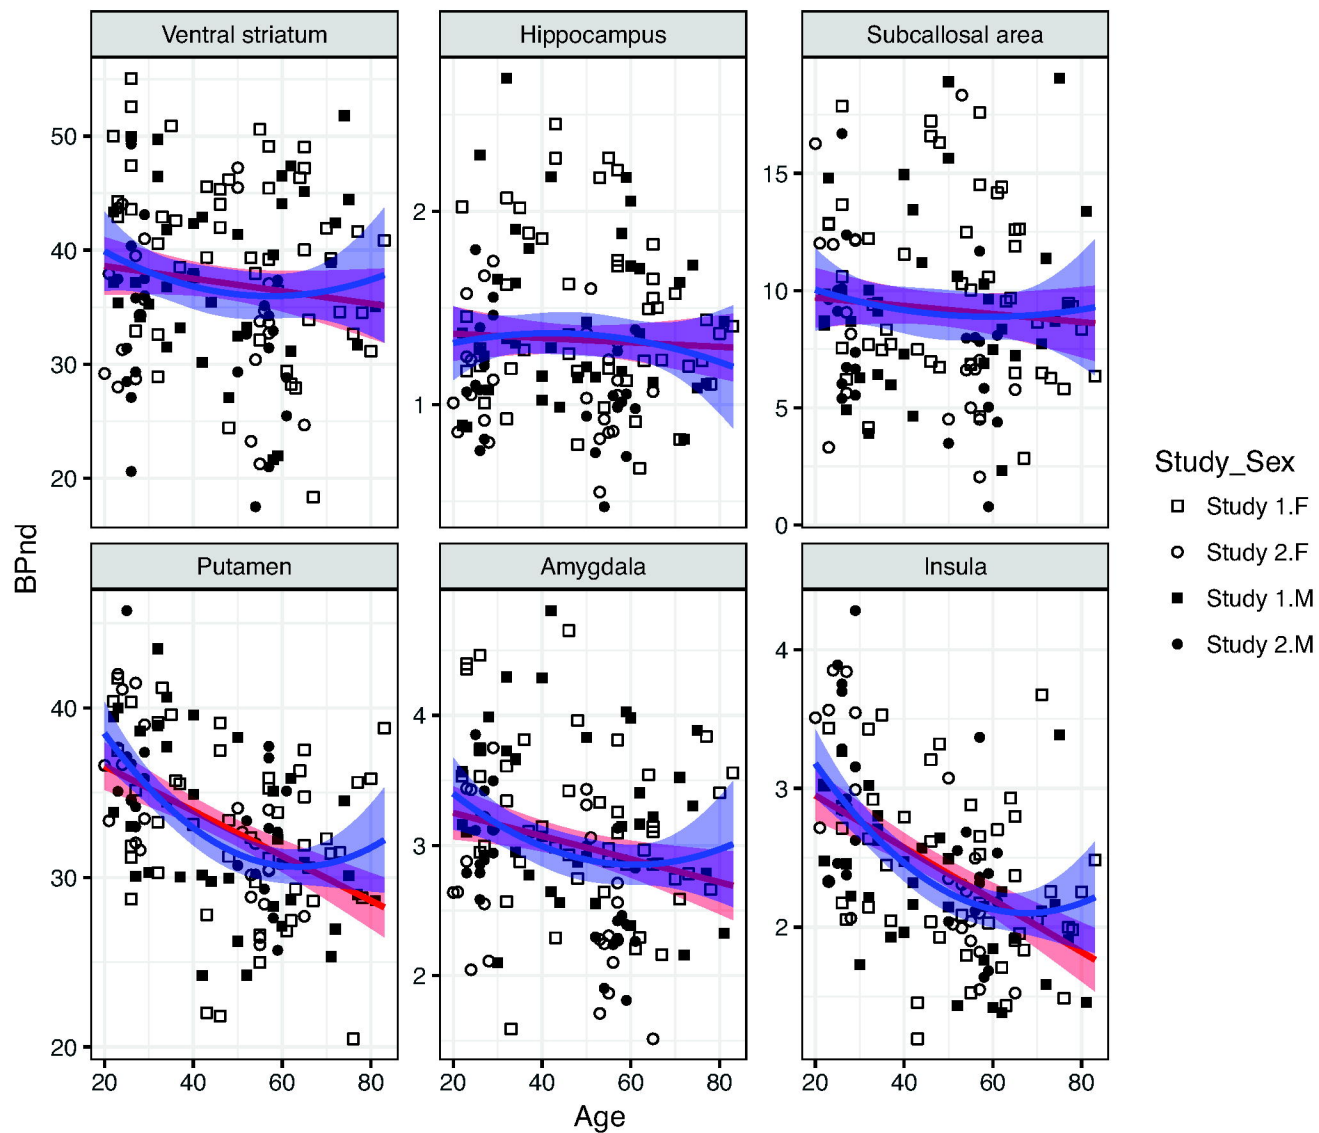

Source: https://www.biorxiv.org/content/10.1101/358200v1.full.pdf
